# Supplementary material for: An antibacterial and absorbable silk-based fixation material with impressive mechanical properties and biocompatibility
Source: PubMed Central journal article supplement (PMC5116670; doi:10.1038/srep37418), 2016-11-21
Supplement: srep37418-s1.pdf [file srep37418-s1.pdf]

## An antibacterial and absorbable silk-based fixation material with impressive mechanical properties and biocompatibility

Chenglong Shi, Xiaobing Pu, Guan Zheng, Xinglong Feng, Xuan Yang, Baoliang Zhang, Yu Zhang, Qingshui Yin, Hong Xia

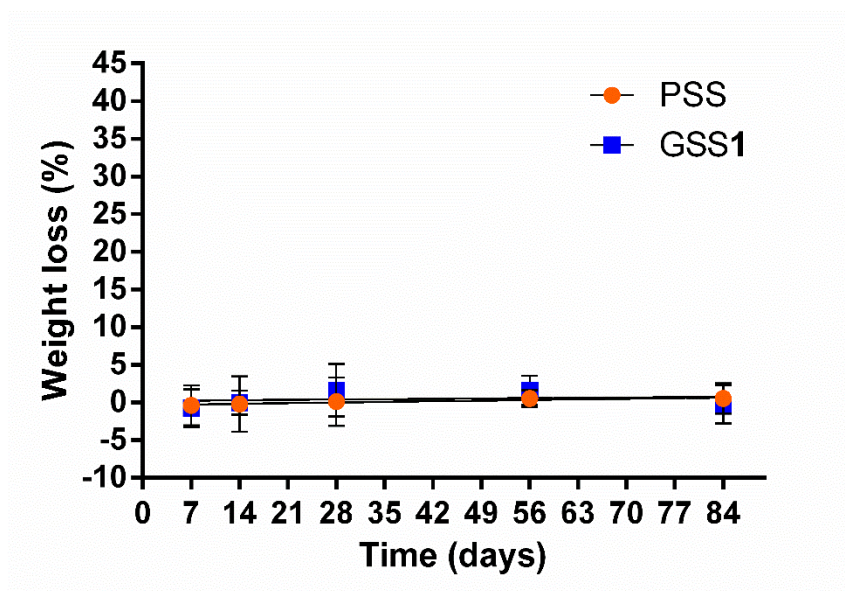

Figure-S1 Weight loss of PSS and GSS1 after immersion in PBS for different durations.

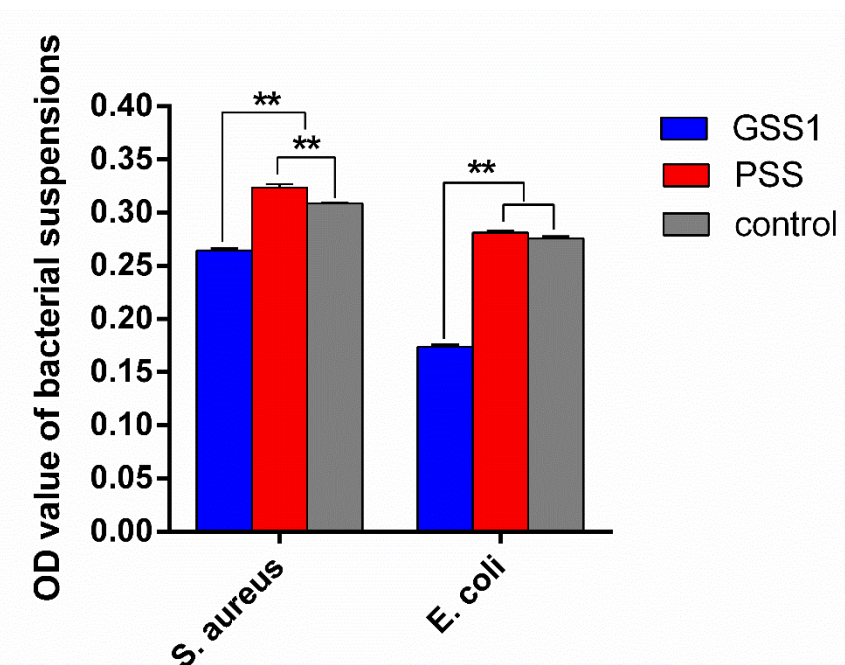

Figure-S2 OD values of *S. aureus* and *E. coli* suspensions after 24 h of incubation. After 24 h of incubation, the OD values of the *S. aureus* and *E. coli* suspensions in GSS1 were significantly ( $p < 0.01$ ) lower than in the control group. In addition, the OD values of *S. aureus* in the PSS group were significantly ( $p < 0.01$ ) higher than in the control group. However, the

*OD values of E. coli between the PSS and control groups were not significantly ( $p > 0.05$ ) different (\*\*  $p < 0.01$ ).*
